# Supplementary material
Source: PubMed Central journal article supplement (PMC7944950)
Supplement: NEJMc2102017_appendix.pdf [file NEJMc2102017_appendix.pdf]

## Supplementary Appendix

This appendix has been provided by the authors to give readers additional information about their work.

Supplement to: Liu Y, Liu J, Xia H, et al. Neutralizing activity of BNT162b2-elicited serum. *N Engl J Med*.  
DOI: 10.1056/NEJMc2102017

(PDF updated on March 8, 2021)

## Table of Contents

| <b><u>Contents</u></b>                                                                                                    | <b><u>Page</u></b> |
|---------------------------------------------------------------------------------------------------------------------------|--------------------|
| Materials and Methods                                                                                                     | 2                  |
| Figure S1. Diagram of engineered spike substitutions and deletions                                                        | 3                  |
| Figure S2. Plaque morphologies of USA-WA1/2020 and mutant SARS-CoV-2                                                      | 4                  |
| Figure S3. Scheme of BNT162 immunization and serum collection                                                             | 4                  |
| Table S1. PRNT <sub>50</sub> 's of twenty BNT162b2 post-immunization sera against USA-WA1/2020 (WT) and mutant SARS-CoV-2 | 5                  |
| Acknowledgements                                                                                                          | 7                  |
| Supplemental References                                                                                                   | 7                  |

## Materials and Methods

**Construction of isogenic viruses.** All recombinant SARS-CoV-2s with spike mutations (**Figure S1**) were prepared on the genetic background of an infectious cDNA clone derived from clinical strain USA-WA1/2020.<sup>6</sup> The mutations were introduced into the spike gene using a PCR-based mutagenesis protocol as reported previously.<sup>7,8</sup> The full-length infectious cDNAs were ligated and used as templates to *in vitro* transcribe full-length viral RNAs. The original viral stocks (P0) were recovered from Vero E6 cells on day 2 post electroporation of the *in vitro* transcribed RNAs. The P0 viruses were propagated on Vero E6 cells for another round to produce P1 viruses for the neutralization assays. The titers of P1 viruses were measured by plaque assay on Vero E6 cells (**Figure S2**). The complete spike sequences of the P1 viruses were confirmed by Sanger sequencing to have only the intended nucleotide changes from the USA-WA1/2020 sequence. A detailed protocol of the above experiments was recently reported.<sup>9</sup>

**Serum specimens and neutralization assay.** **Figure S3** illustrates the immunization and serum collection scheme. A conventional 50% plaque-reduction neutralization test (PRNT<sub>50</sub>) was performed to quantify the serum-mediated virus suppression as previously reported.<sup>10</sup> Briefly, individual sera were 2-fold serially diluted in culture medium with a starting dilution of 1:40 (dilution range of 1:40 to 1:1280). The diluted sera were incubated with 100 PFU of USA-WA1/2020 or mutant SARS-CoV-2. After 1 h incubation at 37 °C, the serum-virus mixtures were inoculated onto a monolayer of Vero E6 cells pre-seeded on 6-well plates on the previous day. A minimal serum dilution that suppressed >50% of viral plaques is defined as PRNT<sub>50</sub>. The neutralization titers are presented in **Table S1**.

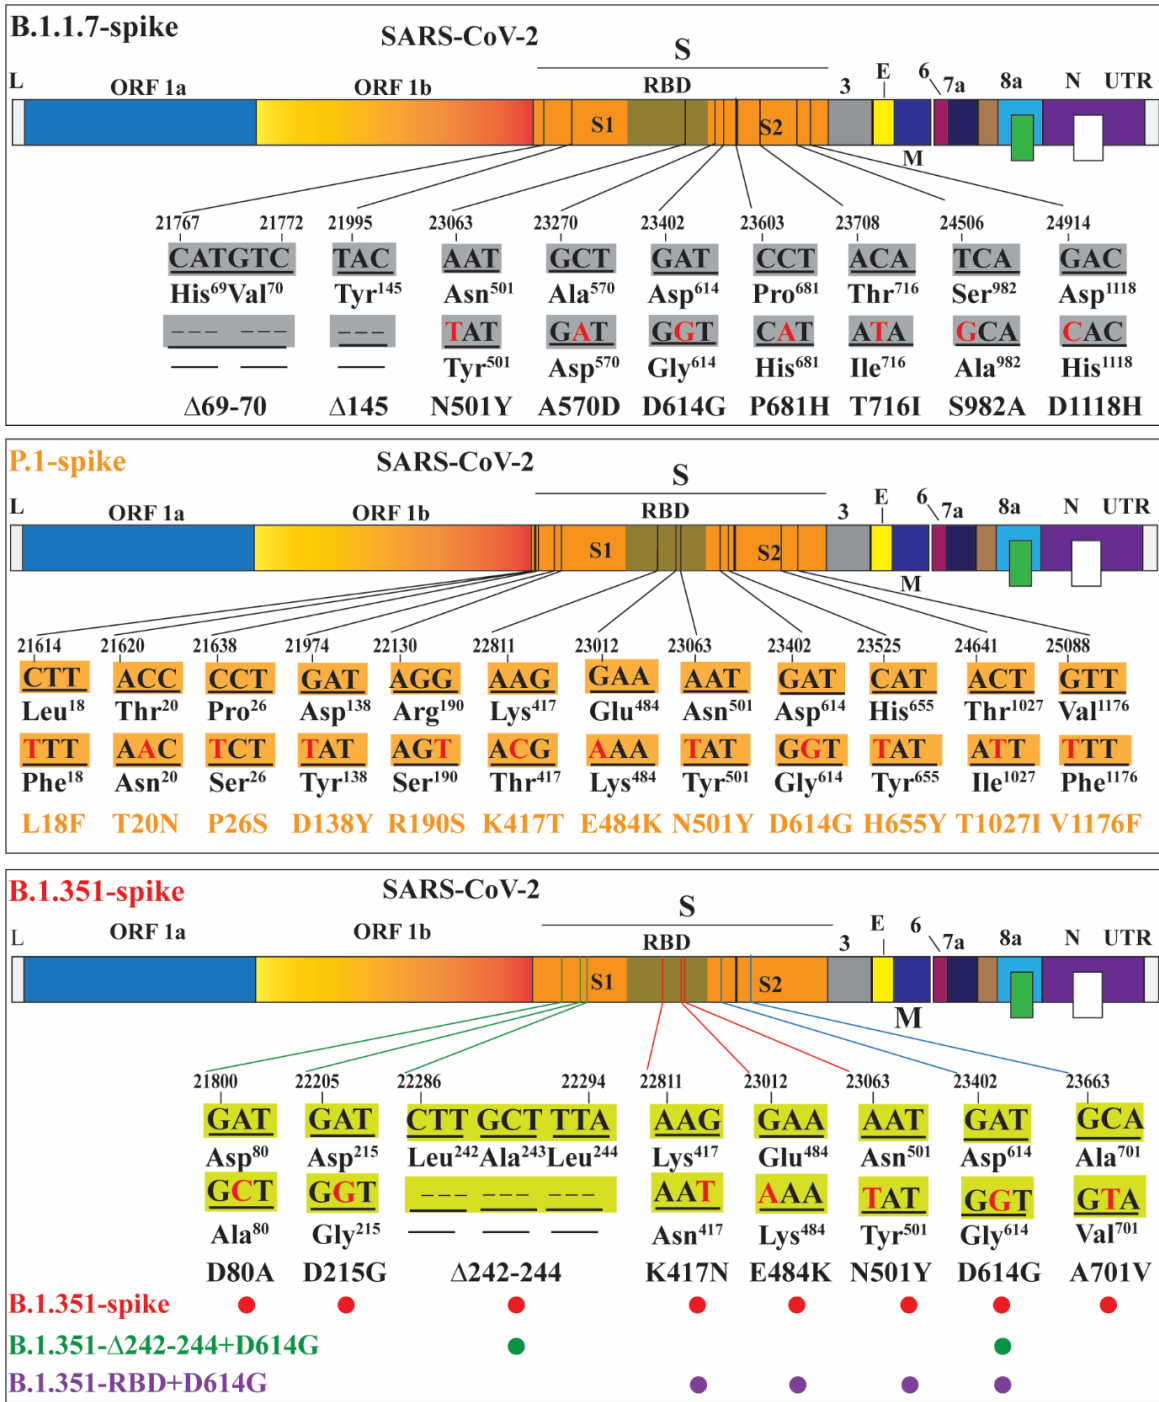

**Figure S1.** Diagram of engineered spike substitutions and deletions. The genome and sequence of clinical isolate USA-WA1/2020 are used as the wild-type virus in this study. Mutations from the United Kingdom B.1.1.7, Brazilian P.1, and South African B.1.351 lineages are presented. Deletions are indicated by dotted lines. Mutated nucleotides are in red. Nucleotide and amino acid positions are indicated. L – leader sequence; ORF – open reading frame; RBD – receptor binding domain; S – spike glycoprotein; S1 – N-terminal furin cleavage fragment of S; S2 – C-terminal furin cleavage fragment of S; E – envelope protein; M – membrane protein; N – nucleoprotein; UTR – untranslated region.

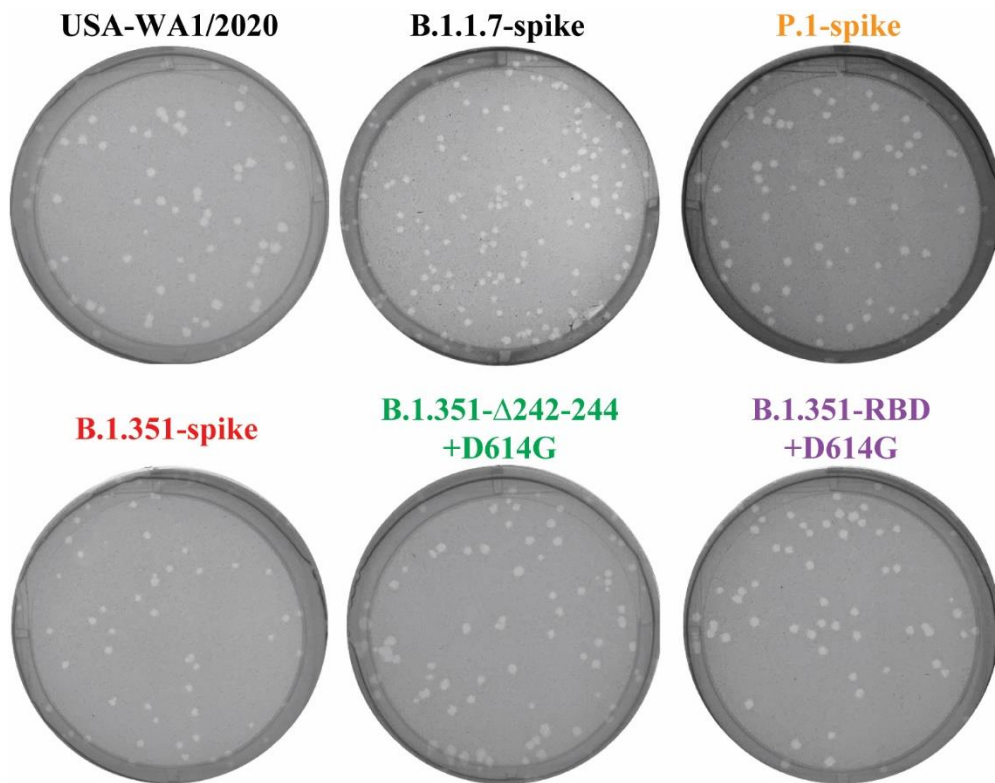

**Figure S2.** Plaque morphologies of USA-WA1/2020 and mutant SARS-CoV-2's. The plaque assays were performed on Vero E6 cells in 6-well plates.

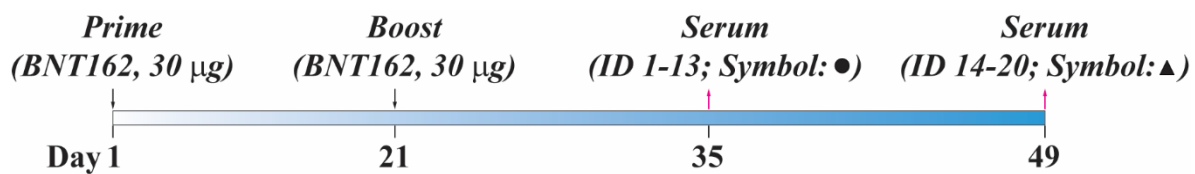

**Figure S3.** Scheme of BNT162 immunization and serum collection.

**Table S1.** PRNT<sub>50</sub>'s of twenty BNT162b2 post-immunization sera against USA-WA1/2020 and mutant SARS-CoV-2.

| Serum           |                     |      | PRNT <sub>50</sub> * |         |         |         |               |           |         |         |               |         |         |                                 |                   |  |  |
|-----------------|---------------------|------|----------------------|---------|---------|---------|---------------|-----------|---------|---------|---------------|---------|---------|---------------------------------|-------------------|--|--|
|                 |                     |      | USA-WA1/2020         |         |         |         | B.1.1.7-spike | P.1-spike |         |         | B.1.351-spike |         |         | B.1.351- $\Delta$ 242-244+D614G | B.1.351-RBD+D614G |  |  |
| ID <sup>^</sup> | Age                 | Week | Exp1                 | Exp2    | Exp3    | GMT     | Exp1          | Exp2      | GMT     | Exp1    | Exp2          | GMT     | Exp1    | Exp2                            | GMT               |  |  |
| 1               | 68                  | 2    | 320                  | 320     | 320     | 320     | 640           | 320       | 320     | 320     | 160           | 160     | 160     | 320                             | 320               |  |  |
| 2               | 67                  | 2    | 160                  | 160     | 160     | 160     | 160           | 80        | 80      | 80      | 40            | 40      | 40      | 160                             | 80                |  |  |
| 3               | 68                  | 2    | 640                  | 640     | 640     | 640     | 640           | 640       | 640     | 640     | 320           | 320     | 320     | 640                             | 640               |  |  |
| 4               | 65                  | 2    | 160                  | 320     | 320     | 254     | 320           | 320       | 320     | 80      | 160           | 113     | 160     | 80                              |                   |  |  |
| 5               | 30                  | 2    | 320                  | 320     | 320     | 320     | 640           | 320       | 320     | 320     | 160           | 160     | 160     | 320                             | 320               |  |  |
| 6               | 23                  | 2    | 320                  | 640     | 640     | 508     | 320           | 640       | 320     | 453     | 160           | 160     | 160     | 320                             | 160               |  |  |
| 7               | 54                  | 2    | 1280                 | 640     | 640     | 806     | 1280          | 640       | 1280    | 905     | 320           | 320     | 320     | 1280                            | 1280              |  |  |
| 8               | 69                  | 2    | 320                  | 320     | 320     | 320     | 320           | 160       | 160     | 160     | 80            | 80      | 80      | 160                             | 160               |  |  |
| 9               | 65                  | 2    | 1280                 | 1280    | 1280    | 1280    | 1280          | 1280      | 640     | 905     | 640           | 640     | 640     | 1280                            | 1280              |  |  |
| 10              | 38                  | 2    | 640                  | 640     | 1280    | 806     | 1280          | 640       | 320     | 453     | 640           | 320     | 453     | 1280                            | 640               |  |  |
| 11              | 44                  | 2    | 320                  | 320     | 320     | 320     | 640           | 320       | 320     | 320     | 80            | 160     | 113     | 320                             | 160               |  |  |
| 12              | 52                  | 2    | 640                  | 640     | 640     | 640     | 640           | 640       | 320     | 453     | 160           | 160     | 160     | 320                             | 320               |  |  |
| 13              | 28                  | 2    | 1280                 | 1280    | 1280    | 1280    | 1280          | 640       | 640     | 640     | 160           | 320     | 226     | 1280                            | 640               |  |  |
| 14              | 69                  | 4    | 320                  | 320     | 640     | 403     | 320           | 320       | 160     | 226     | 160           | 80      | 113     | 320                             | 160               |  |  |
| 15              | 68                  | 4    | 640                  | 640     | 640     | 640     | 640           | 1280      | 640     | 905     | 320           | 320     | 320     | 640                             | 320               |  |  |
| 16              | 26                  | 4    | 320                  | 320     | 640     | 403     | 1280          | 640       | 320     | 453     | 160           | 320     | 226     | 640                             | 320               |  |  |
| 17              | 54                  | 4    | 1280                 | 1280    | 1280    | 1280    | 1280          | 1280      | 640     | 905     | 320           | 320     | 320     | 1280                            | 640               |  |  |
| 18              | 35                  | 4    | 640                  | 640     | 640     | 640     | 640           | 640       | 320     | 453     | 160           | 320     | 226     | 320                             | 320               |  |  |
| 19              | 44                  | 4    | 640                  | 640     | 640     | 640     | 640           | 1280      | 640     | 905     | 320           | 320     | 320     | 640                             | 640               |  |  |
| 20              | 52                  | 4    | 640                  | 640     | 640     | 640     | 1280          | 640       | 320     | 453     | 160           | 160     | 160     | 640                             | 320               |  |  |
|                 | GMT <sup>†</sup>    |      | 502                  | 520     | 577     | 532     | 663           | 520       | 368     | 437     | 184           | 204     | 194     | 485                             | 331               |  |  |
|                 | 95% CI <sup>#</sup> |      | 371-680              | 401-674 | 443-751 | 409-693 | 497-884       | 372-726   | 275-491 | 325-589 | 133-255       | 151-276 | 144-261 | 345-681                         | 228-480           |  |  |

\*The data for USA-WA1/2020 are from three experiments; the data for B.1.1.7-spike, B.1.351- $\Delta$ 242-244+D614G, and B.1.351-RBD-D614G viruses are from one experiment each; and the data for P.1-spike and B.1.351-spike viruses are from two experiments. For each independent experiment, individual PRNT<sub>50</sub> value is the geometric mean of duplicate plaque assay results; no differences were observed between the duplicate assays.

<sup>^</sup>Pairs of serum samples were obtained from a single participant as follows: Serum ID 1 and 15, 7 and 17, 8 and 14, 11 and 19, and 12 and 20.

†Geometric mean neutralizing titers.

#95% confidence interval (95% CI) for the GMT.

## Acknowledgements

We thank the Pfizer-BioNTech clinical trial C4591001 participants, from whom the post-immunization human sera were obtained. We thank the many colleagues at Pfizer and BioNTech who developed and produced the BNT162b2 vaccine candidate. We thank Larissa Falcao, Parinati Kharel, and Frank Gillett for gene synthesis.

## Supplemental References

6. Xie X, Muruato A, Lokugamage KG, et al. An Infectious cDNA Clone of SARS-CoV-2. *Cell Host Microbe* 2020;27:841-8 e3.
7. Plante JA, Liu Y, Liu J, et al. Spike mutation D614G alters SARS-CoV-2 fitness. *Nature* 2020. doi: 10.1038/s41586-020-2895-3.
8. Xie X, Liu Y, Liu J, et al. Neutralization of SARS-CoV-2 spike 69/70 deletion, E484K and N501Y variants by BNT162b2 vaccine-elicited sera. *Nat Med* 2021. doi: 10.1038/s41591-021-01270-4.
9. Xie X, Lokugamage KG, Zhang XV, M.N. , Muruato AE, Menachery VD, Shi P-Y. Engineering SARS-CoV-2 using a reverse genetic system. *Nature Protocols* 2021:https://doi.org/10.1038/s41596-021-00491-8.
10. Muruato AE, Fontes-Garfias CR, Ren P, et al. A high-throughput neutralizing antibody assay for COVID-19 diagnosis and vaccine evaluation. *Nat Commun* 2020;11:4059.
